# Supplementary material
Source: PubMed Central journal article supplement (PMC8117134)

**Supplemental Table 1.** Clinical characteristics of 10 cGVHD patients with sclerosis (patients 1-10) and 2 cGVHD patients with no skin involvement (patients 11, 12)

| Patient                                | 1    | 2    | 3   | 4    | 5    | 6    | 7    | 8    | 9    | 10   | 11                  | 12   | Summary†                                         |                          |
|----------------------------------------|------|------|-----|------|------|------|------|------|------|------|---------------------|------|--------------------------------------------------|--------------------------|
| Age/sex‡                               | 51M  | 40M  | 33M | 47M  | 71F  | 28F  | 53M  | 52M  | 55M  | 48M  | 11M                 | 37M  | 48 [34 – 53]<br>83% M                            |                          |
| BMI                                    | 32.5 | 20.7 | -   | 23.6 | 21.4 | 14.3 | 28.8 | 25.2 | 24.1 | 20.1 | 22.2                | 24.3 | 23.6 [20.7-25.2]                                 |                          |
| Disease§                               | AML  | MM   | ALL | NHL  | AML  | NHL  | ALL  | MDS  | AML  | ALL  | ALL                 | NHL  | 33% ALL<br>25% AML<br>25% NHL<br>8% MM<br>8% MDS |                          |
| Graft source                           | PB   | PB   | PB  | PB   | PB   | PB   | PB   | PB   | BM   | PB   | BM                  | PB   | 83% PB<br>17% BM                                 |                          |
| Months post-HCT                        | 8    | 34   | 56  | 86   | 64   | 64   | 36   | 153  | 57   | 23   | 56                  | 36   | 56 [27 – 64]<br>months                           |                          |
| Number of prior lines of cGVHD therapy | 1    | 2    | 6   | 3    | 3    | 6    | 2    | 1    | 6    | 4    | 1                   | 8    | 3 [1 – 6] prior therapies                        |                          |
| Follow-up time (months)                | 5    | 7    | 7   | 5    | 9    | 7    | 8    | 3    | 5    | 2    | 3                   | 3    | 5 [3 – 7] months                                 |                          |
| Clinic visits (#)                      | 10   | 4    | 5   | 5    | 11   | 20   | 10   | 4    | 7    | 5    | 2                   | 7    | 6 [5 – 10] visits                                |                          |
| Measurement sessions (#)               | 6    | 8    | 9   | 3    | 4    | 9    | 15   | 3    | 3    | 3    | 4                   | 4    | 5 [3 – 9] sessions                               |                          |
| Response type¶                         | PR   | PR   | SD  | SD   | SD   | SD   | PR   | PD   | PD   | SD   | No skin involvement |      | 5/10 SD<br>3/10 PR<br>2/10 PD                    |                          |
| NIH skin score&                        |      |      |     |      |      |      |      |      |      |      |                     |      |                                                  |                          |
| Baseline                               | 2    | 3    | 3   | 3    | 3    | 3    | 3    | 3    | 3    | 2    |                     |      |                                                  | 8/10 NIH 3<br>2/10 NIH 2 |
| Study Completion                       | 2    | 3    | 3   | 3    | 3    | 3    | 2    | 3    | 3    | 2    |                     |      |                                                  | 7/10 NIH 3<br>3/10 NIH 2 |
| Presence of erythema                   | +    | +    | -   | -    | +    | +    | -    | -    | +    | +    |                     |      | 6/10 erythema+                                   |                          |
| Presence of sclerosis                  | +    | +    | +   | +    | +    | +    | +    | +    | +    | +    |                     |      | 10/10 sclerosis+                                 |                          |
| Patient global severity rating (1-3)*  | 2    | 2    | 3   | 2    | 2    | 3    | 3    | 3    | 2    | 2    | 1                   | -    |                                                  |                          |
| Provider global severity rating (0-3)+ | 3    | 3    | 3   | 3    | 3    | 3    | 3    | 3    | 3    | 3    | 1                   | 3    |                                                  |                          |
| NIH organ scores                       |      |      |     |      |      |      |      |      |      |      |                     |      |                                                  |                          |
| Oral                                   | 1    | 0    | -   | 0    | 1    | 1    | 1    | 2    | 0    | 0    | 0                   | 0    |                                                  |                          |
| Gastrointestinal                       | 0    | 0    | -   | 0    | 0    | 0    | 0    | 0    | 0    | 0    | 0                   | 0    |                                                  |                          |
| Eye                                    | 3    | 3    | 3   | 1    | 1    | 0    | 1    | 3    | 0    | 3    | 0                   | 2    |                                                  |                          |
| Joints and fascia                      | 0    | 0    | 2   | 0    | 0    | 3    | 0    | 0    | 0    | 0    | 1                   | 0    |                                                  |                          |
| Lung                                   | 0    | 0    | 0   | 1    | 0    | 2    | 0    | 0    | 3    | 0    | 1                   | 3    |                                                  |                          |
| Liver                                  | 1    | 0    | -   | 0    | 0    | 0    | 0    | 0    | 0    | 0    | 0                   | 0    |                                                  |                          |
| Genital                                | 0    | 0    | -   | 0    | 0    | 0    | 0    | 0    | 0    | 2    | 0                   | 0    |                                                  |                          |

Colors represent skin response (blue: clinical improvement, grey: stable disease, orange: progressive disease, green: no skin involvement)

†Values are shown as median [IQR] for continuous variables and n (%) for categorical variables.

‡Sex: M: Male, F: Female

§Disease: AML, Acute myeloblastic leukemia; ALL, acute lymphoblastic leukemia; NHL, non-Hodgkin lymphoma; MM, multiple myeloma; MDS, myelodysplastic syndrome

||Graft source: PB: Peripheral Blood, BM: Bone Marrow

¶Response type: PR: partial response, SD: stable disease, PD: progressive skin disease.

&The NIH skin score is the higher of its two component scores: a score based on the percent of body surface area affected by active cutaneous manifestations and a score based on the severity of sclerosis. We obtained the total NIH skin score by chart review, but its component scores were not consistently detailed. However, presence of sclerotic disease was noted in the oncology clinic notes for patients 1-10.

\*Patient global rating (Chronic GVHD Activity Assessment-Patient Self Report - Form B from Reference 2): 1=mild, 2=moderate, 3=severe

+Provider global rating (Chronic GVHD Activity Assessment-Clinician - Form A from Reference 2): 0=none, 1=mild, 2=moderate, 3=severe

**Supplemental Figure 1.** MyotonPRO device

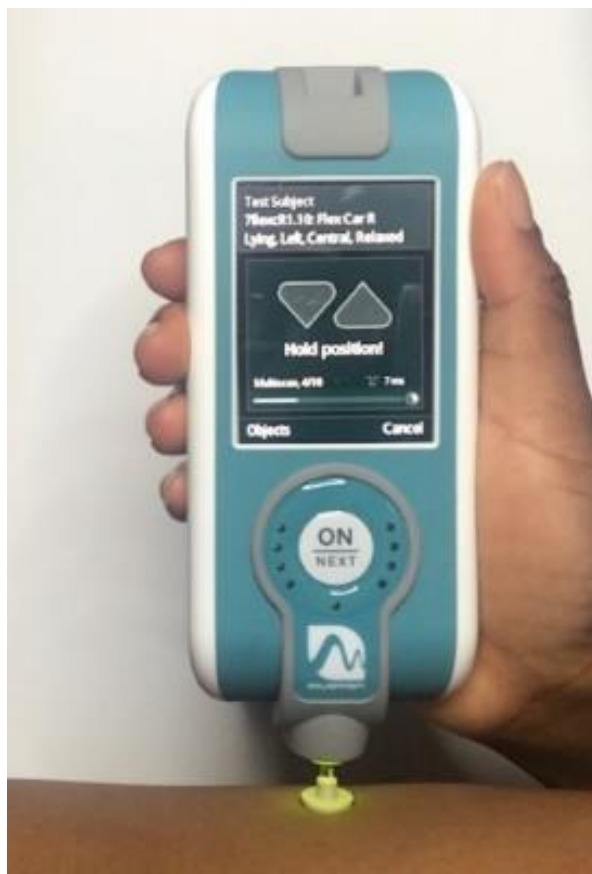

**Supplemental Figure 2.** MyotonPRO measurement data and linear regression slopes of 10 cGVHD patients with sclerosis (patients 1-10) and 2 cGVHD patients with no skin involvement (patients 11, 12).

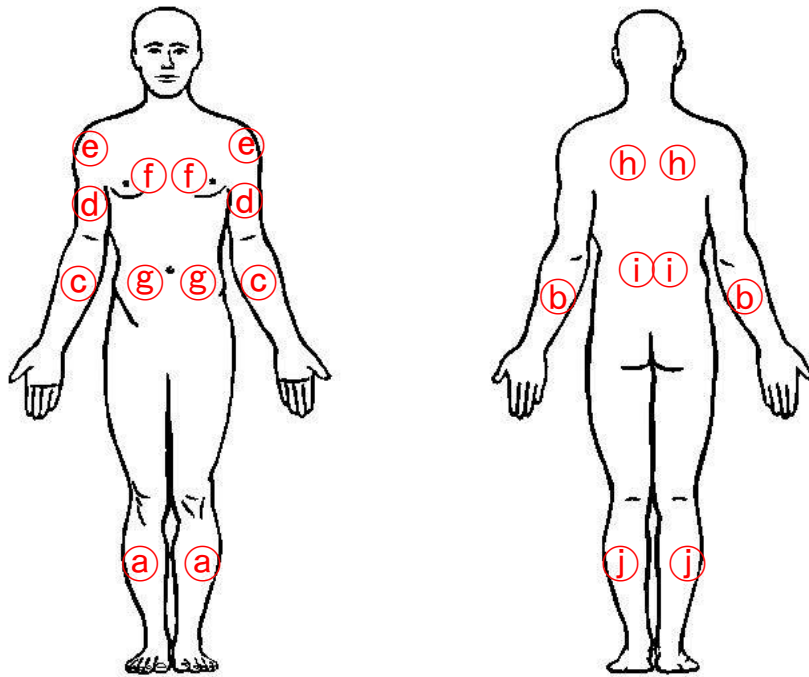

| Patient                                        | 1    | 2    | 3    | 4    | 5    | 6    | 7    | 8    | 9    | 10   | 11   | 12   | Summary†*              |
|------------------------------------------------|------|------|------|------|------|------|------|------|------|------|------|------|------------------------|
| Measured sites&                                |      |      |      |      |      |      |      |      |      |      |      |      |                        |
| a) Tibialis anterior                           | +    | +    | +    | +    | +    | +    | +    | +    | +    | +    | +    | +    | 100% TA+               |
| b) Extensor digitorum                          | -    | -    | +    | +    | +    | +    | +    | -    | +    | +    | +    | +    | 75% ED+                |
| c) Brachioradialis                             | -    | -    | +    | -    | -    | +    | +    | -    | -    | +    | +    | +    | 50% BR+                |
| d) Biceps brachii                              | -    | -    | +    | +    | +    | +    | +    | -    | +    | +    | +    | +    | 75% BIL+               |
| e) Deltoideus                                  | -    | -    | +    | -    | +    | +    | +    | -    | -    | +    | +    | +    | 58% MDE+               |
| f) Pectoralis major                            | -    | -    | +    | -    | +    | +    | +    | -    | -    | +    | +    | +    | 58% PEC+               |
| g) Rectus abdominis                            | +    | +    | +    | -    | +    | +    | +    | +    | +    | +    | +    | +    | 92% RA+                |
| h) Medial trapezius                            | -    | -    | -    | -    | -    | +    | -    | -    | -    | -    | +    | -    | 17% TRAPM+             |
| i) Erector spinae                              | -    | -    | -    | -    | -    | +    | -    | -    | -    | -    | +    | -    | 17% ERSPN+             |
| j) Gastrocnemius                               | -    | -    | -    | +    | -    | +    | -    | +    | +    | -    | +    | -    | 42% GASL+              |
| Measurement sessions (#)                       | 6    | 8    | 9    | 3    | 4    | 9    | 15   | 3    | 3    | 3    | 4    | 4    | 5 [3 – 9] sessions     |
| Follow-up time (months)                        | 5    | 7    | 7    | 5    | 9    | 7    | 8    | 3    | 5    | 2    | 3    | 3    | 5 [3 – 7] months       |
| Starting stiffness (N/m)                       | 592  | 620  | 716  | 903  | 688  | 624  | 536  | 997  | 666  | 478  | 305  | 395  | 662 [507-702]          |
| Ending stiffness (N/m)                         | 296  | 371  | 618  | 832  | 669  | 667  | 509  | 1053 | 782  | 562  | 319  | 407  | 590 [389-726]          |
| Slope (N/m/month)                              | -148 | -40  | -16  | -15  | -5   | 1    | 3    | 18   | 36   | 45   | 3    | 3    | 3 [-12 – 35] N/m/month |
| Coefficient of determination (R <sup>2</sup> ) | 0.57 | 0.22 | 0.25 | 0.89 | 0.41 | 0.00 | 0.18 | 0.11 | 1.00 | 0.96 | 0.24 | 0.52 | 0.33 [0.21 – 0.81]     |

^ Values are shown as median [IQR] for continuous variables and n (%) for categorical variables.

& +: bilateral measurements of the site were included in the analysis, -: the site was not included in the analysis.

\*Muscle abbreviations: TA: tibialis anterior, ED: extensor digitorum, BR: brachioradialis, BIL: biceps brachii caput longus, MDE: medial deltoid, PEC: pectoralis major, RA: rectus abdominis, TRAPM: medial trapezius, ERSPN: erector spinae, GASL: gastrocnemius caput laterale.

**Supplemental Figure 3.** Average stiffness measurements for ten sclerotic cGVHD patients (patients 1-10) and two cGVHD patients without skin manifestations (patients 11, 12) over the study period.

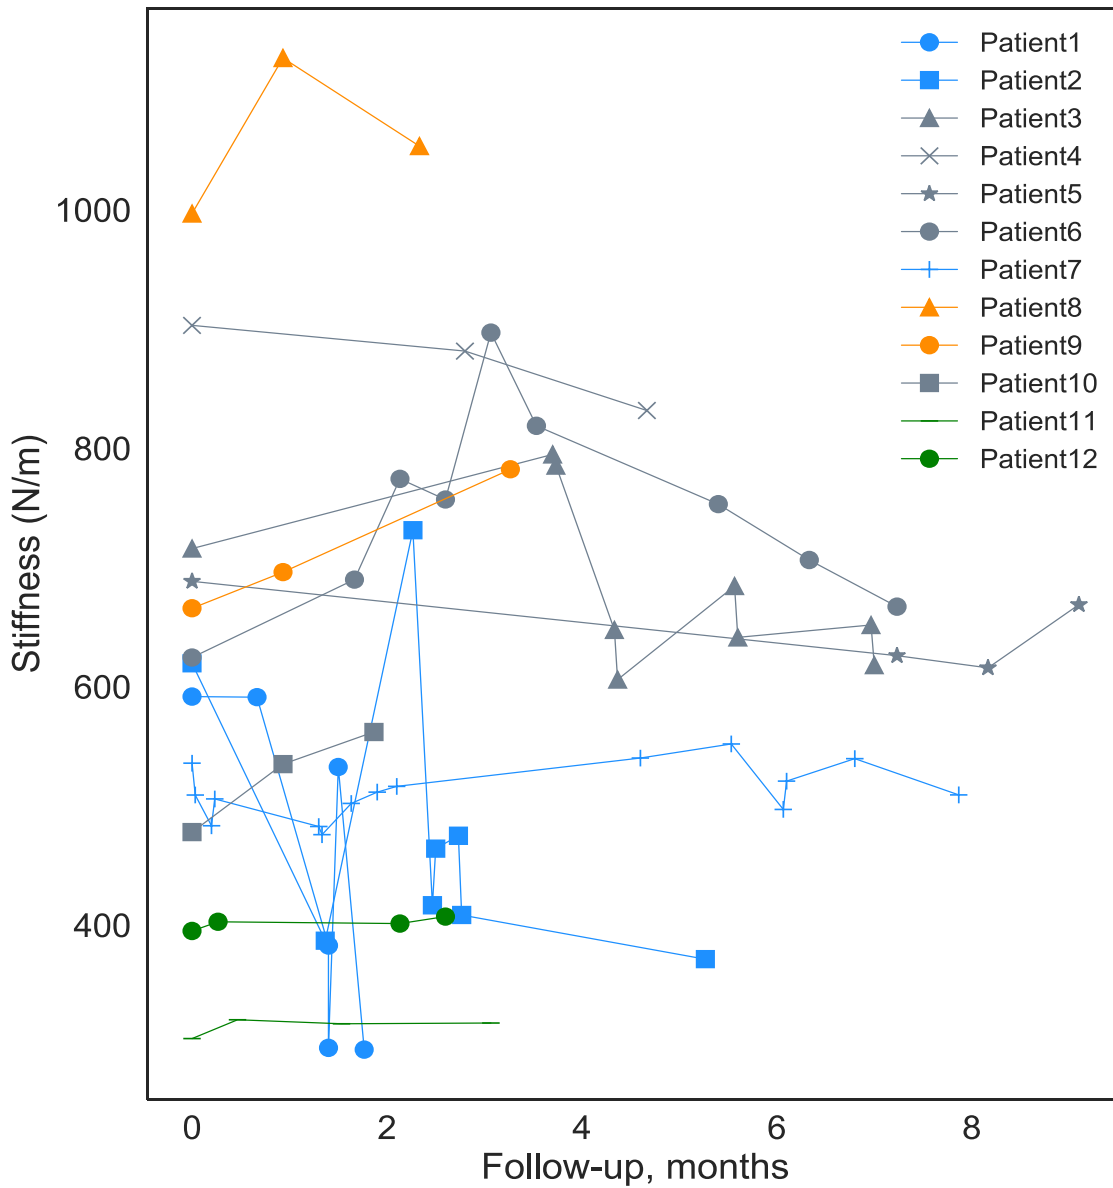

Supplement: NIHMS1699349-supplement-Supplement.pdf [file NIHMS1699349-supplement-Supplement.pdf]
